# Supplementary material for: Rhodium-catalysed conjugate addition of arylboronic acids to enantiopure dehydroamino acid derivatives
Source: Royal Society of Chemistry journal article supplement (doi:10.1039/c0ob00158a), 2010-01-01

## Supporting information-Rhodium-catalysed conjugate addition of arylboronic acids to enantiopure dehydroamino acid derivatives

Jonathan D. Hargrave,<sup>a</sup> Gerwyn Bish,<sup>b</sup> Gabriele Kociok Köhn and Christopher G. Frost<sup>\*a</sup>

<sup>a</sup> Department of Chemistry, University of Bath, Claverton Down, Bath, BA2 7AY, UK. Fax: 01225 386231; Tel: 01225 386142; E-mail: [c.g.frost@bath.ac.uk](mailto:c.g.frost@bath.ac.uk)

<sup>b</sup> Pfizer Limited, Ramsgate Road, Sandwich, Kent, CT13 9NJ, UK.

### General experimental:

IR spectra were recorded on a Perkin-Elmer 1600 FT IR spectrophotometer, using NaCl discs. <sup>1</sup>H NMR spectra were obtained on a Bruker Avance 300 spectrometer operating at 300 MHz, unless otherwise noted, with tetramethylsilane as an internal standard. *J* values are given in Hz. <sup>13</sup>C NMR spectra were obtained on a Bruker Avance 300 spectrometer operating at 75 MHz, unless otherwise noted. All dry solvents were freshly distilled under nitrogen prior to use. Mass spectra were obtained on a Bruker Time-of-Flight mass spectrometer (ESI-TOF). Enantiomeric excesses were determined using HPLC (see data see individual compounds details) with a UV detector at 254 nm. Tetrahydrofuran was distilled over alumina column. Petroleum ether refers to that fraction obtained between 40-60 °C. All other reagents were obtained from commercial suppliers and used as received. All glassware used under anhydrous conditions was dried in an oven and allowed to cool under nitrogen prior to use. All reactions were carried out under argon unless otherwise stated. Flash chromatography was conducted under medium pressure, using matrix 60 silica.

CCDC 776776 contains the supplementary crystallographic data for this paper. These data can be obtained free of charge from The Cambridge Crystallographic Data Centre via [www.ccdc.cam.ac.uk/data\\_request/cif](http://www.ccdc.cam.ac.uk/data_request/cif).

### <sup>1</sup>H and <sup>13</sup>C NMR Spectra:

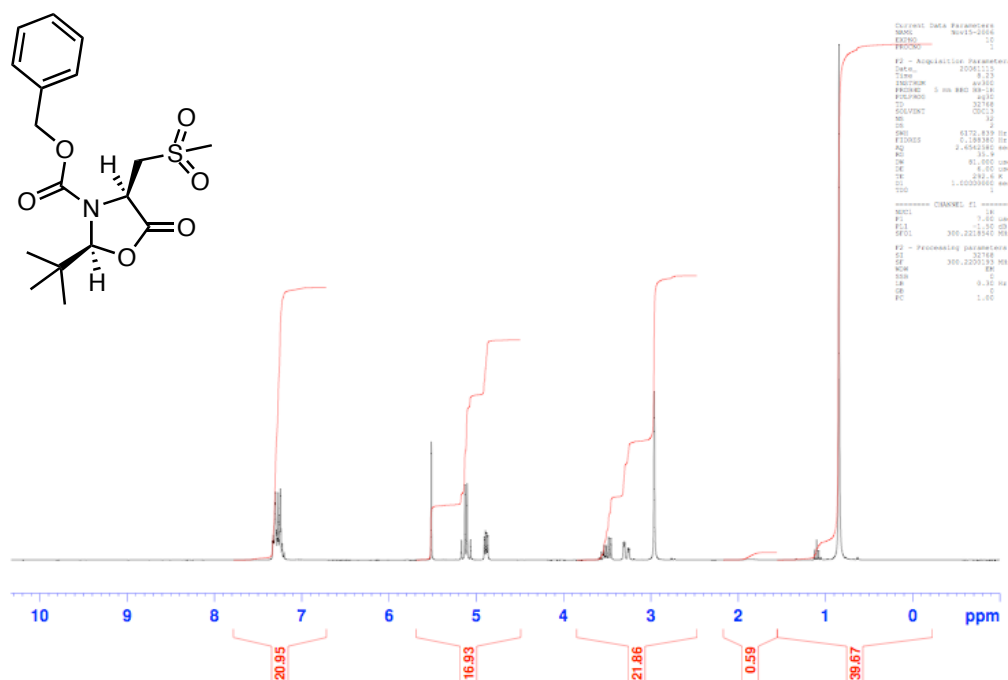

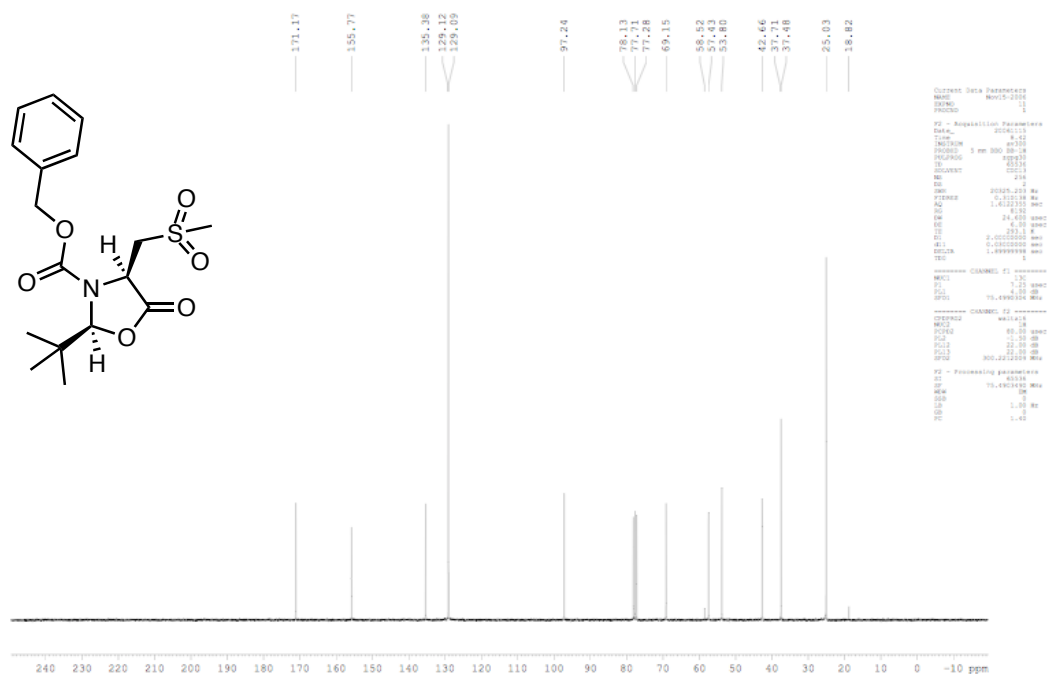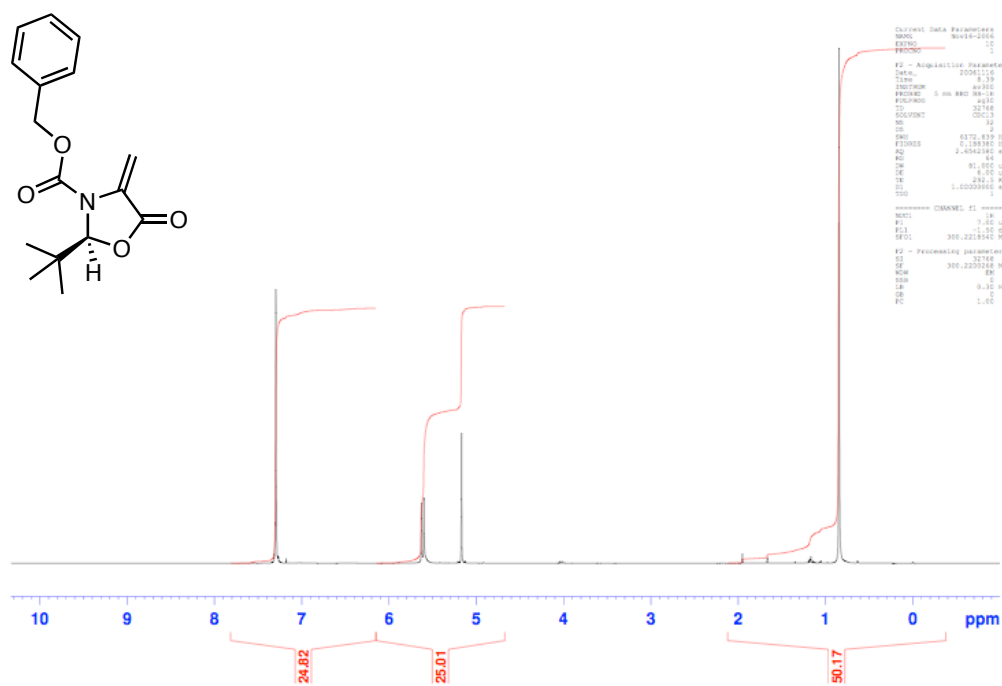

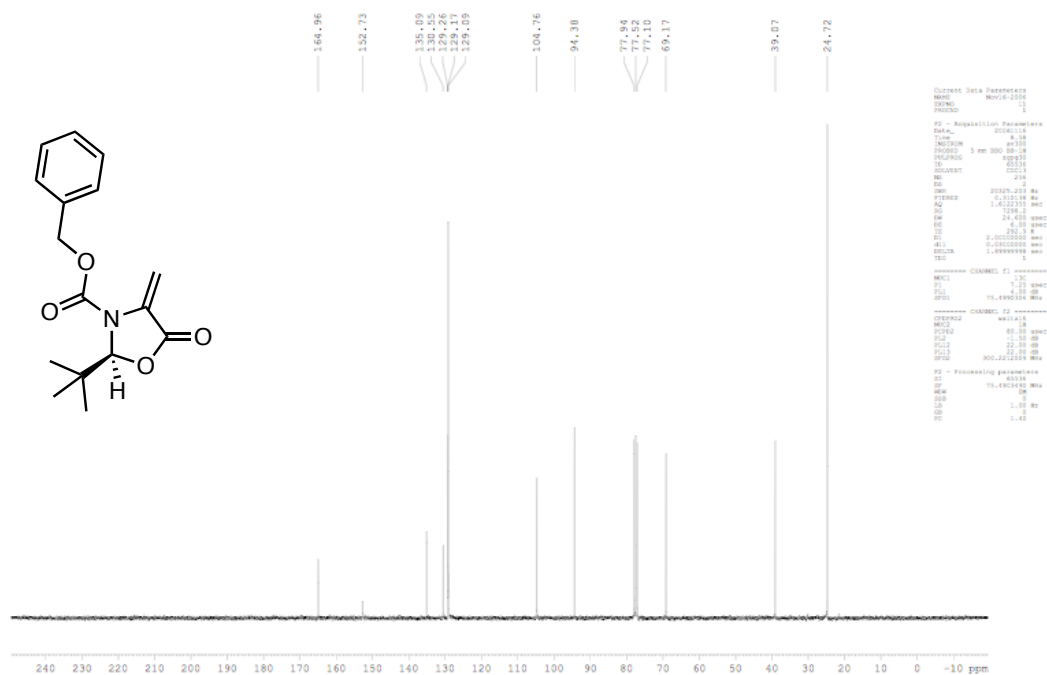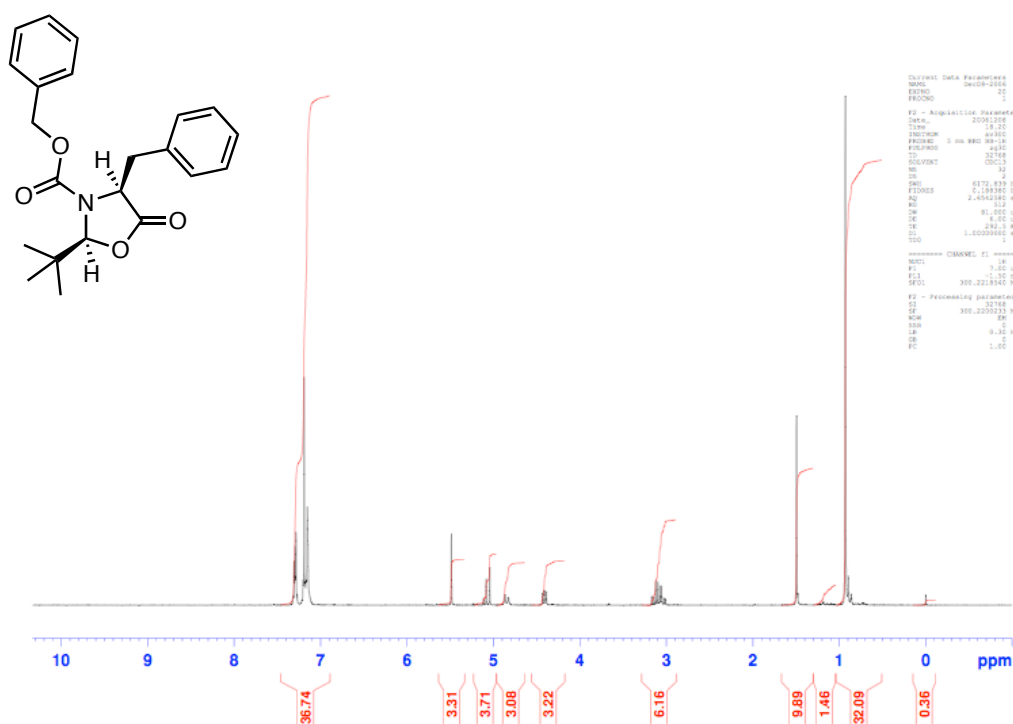

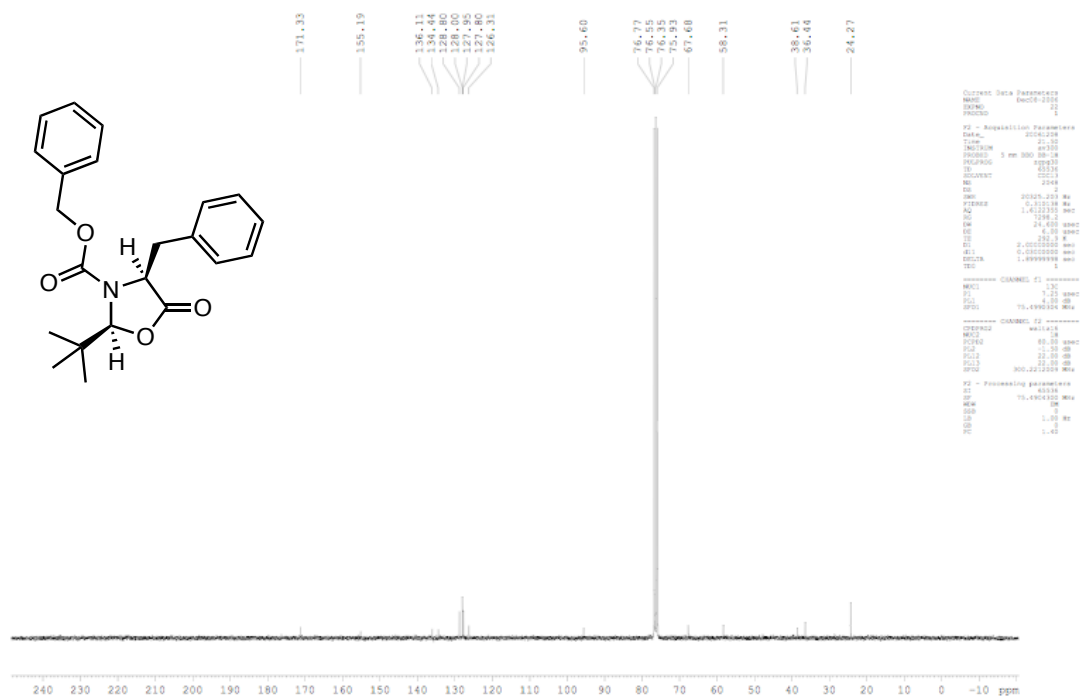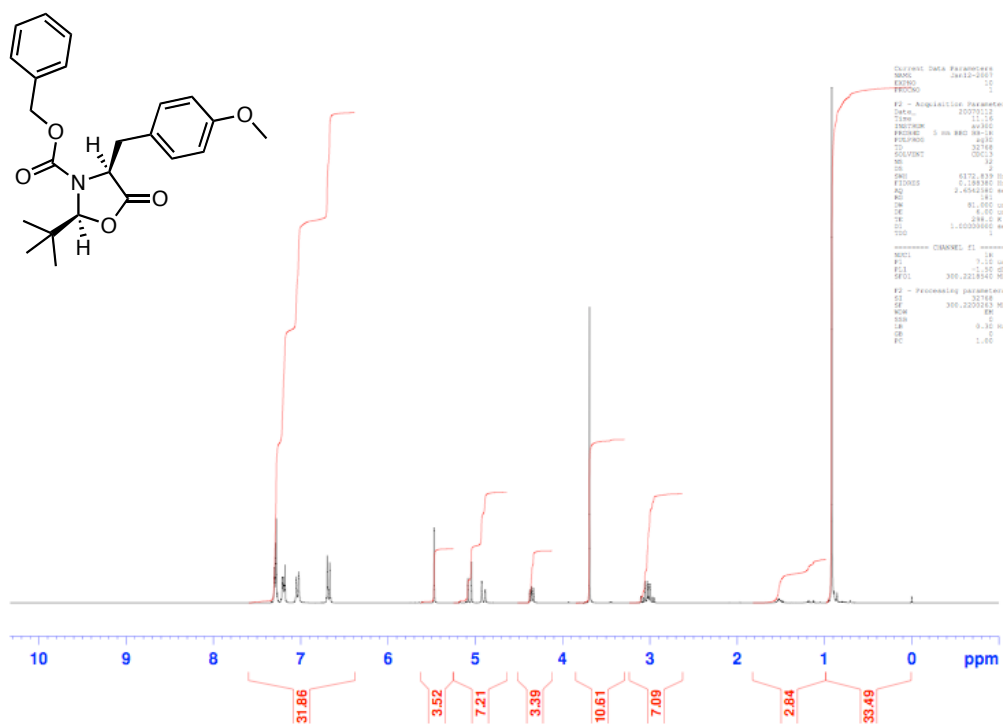

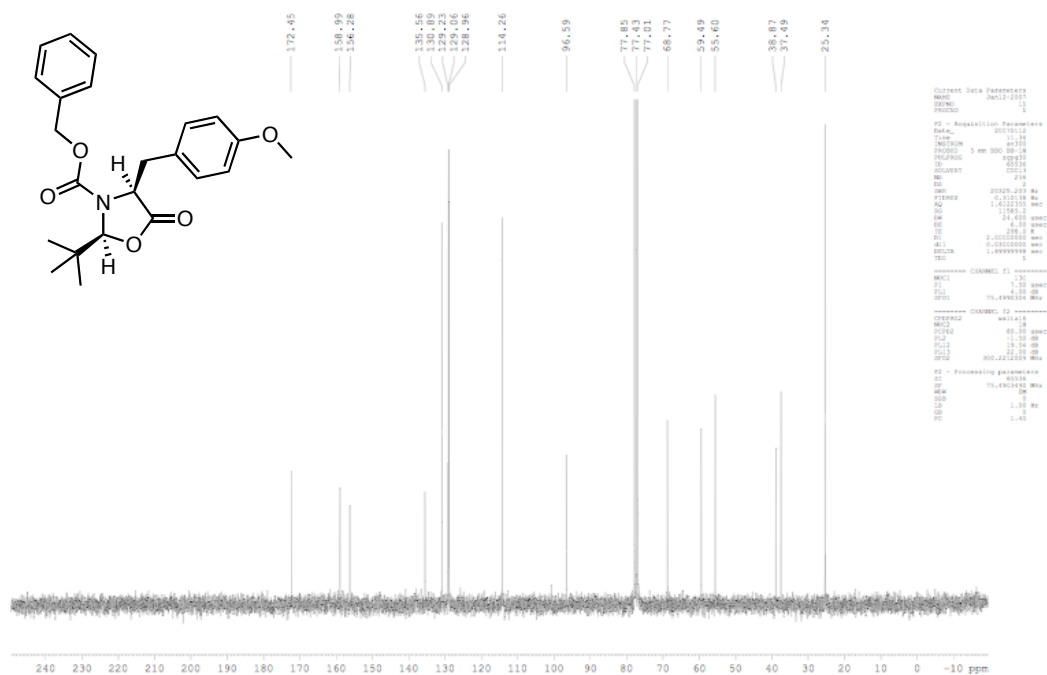

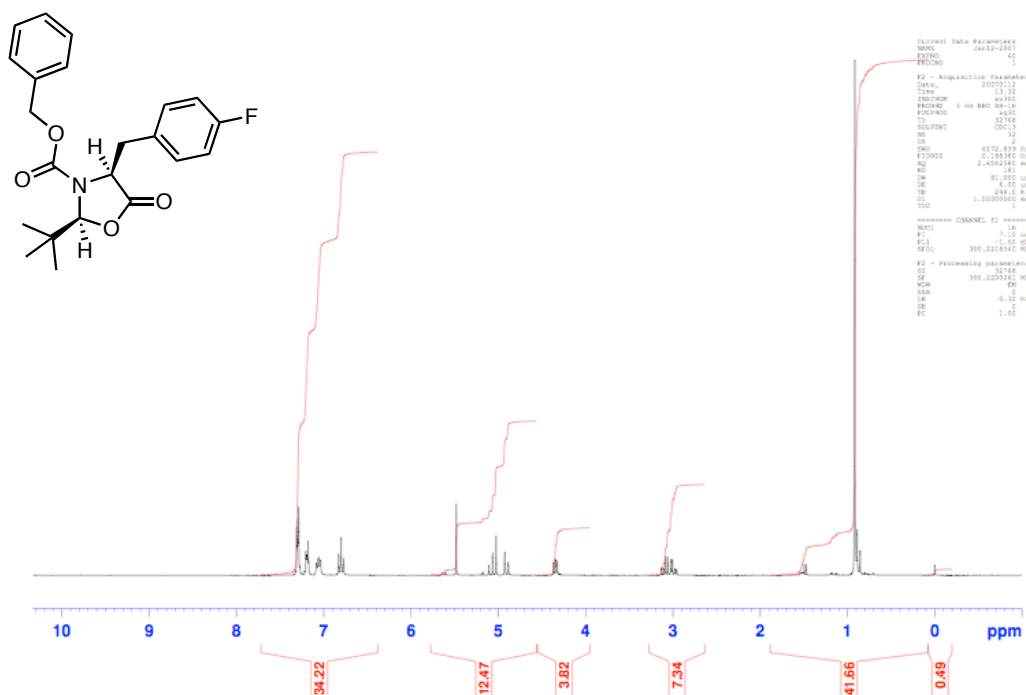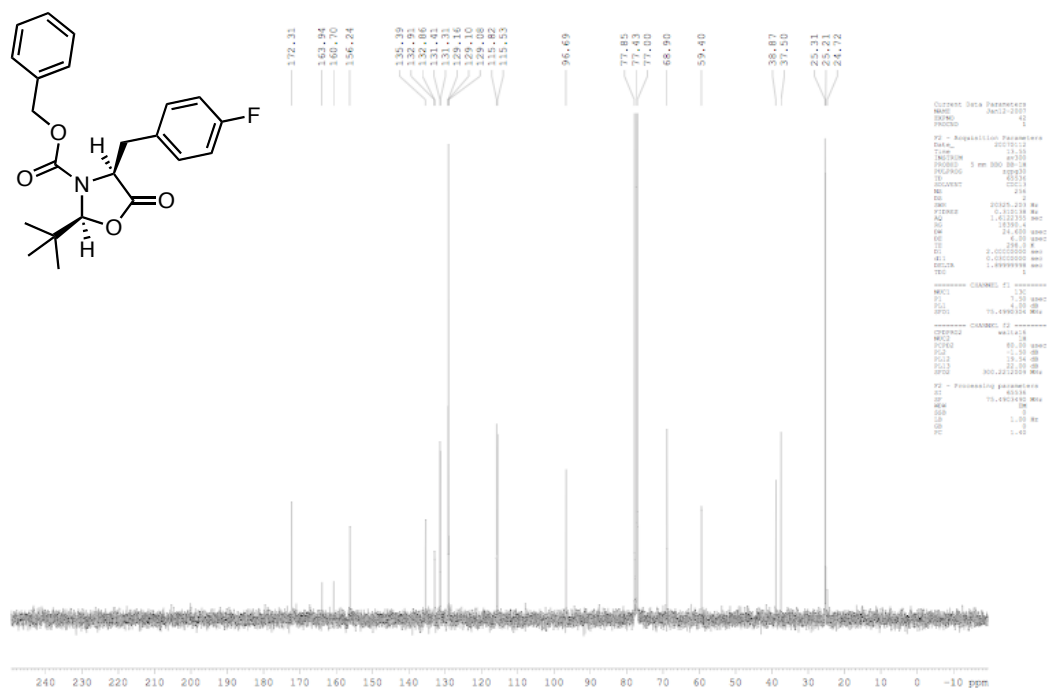

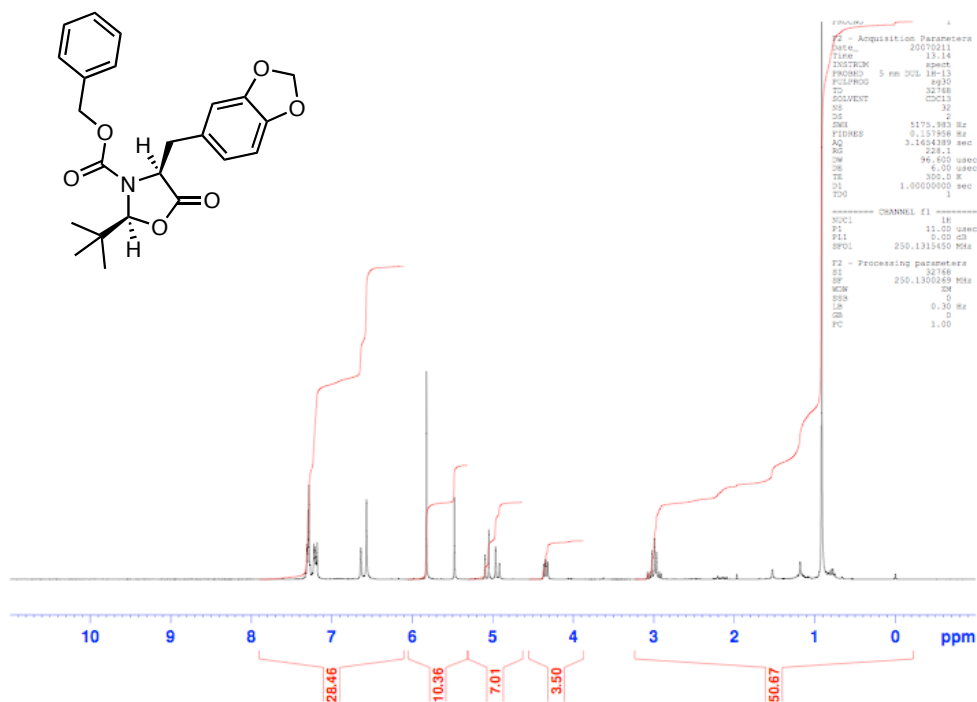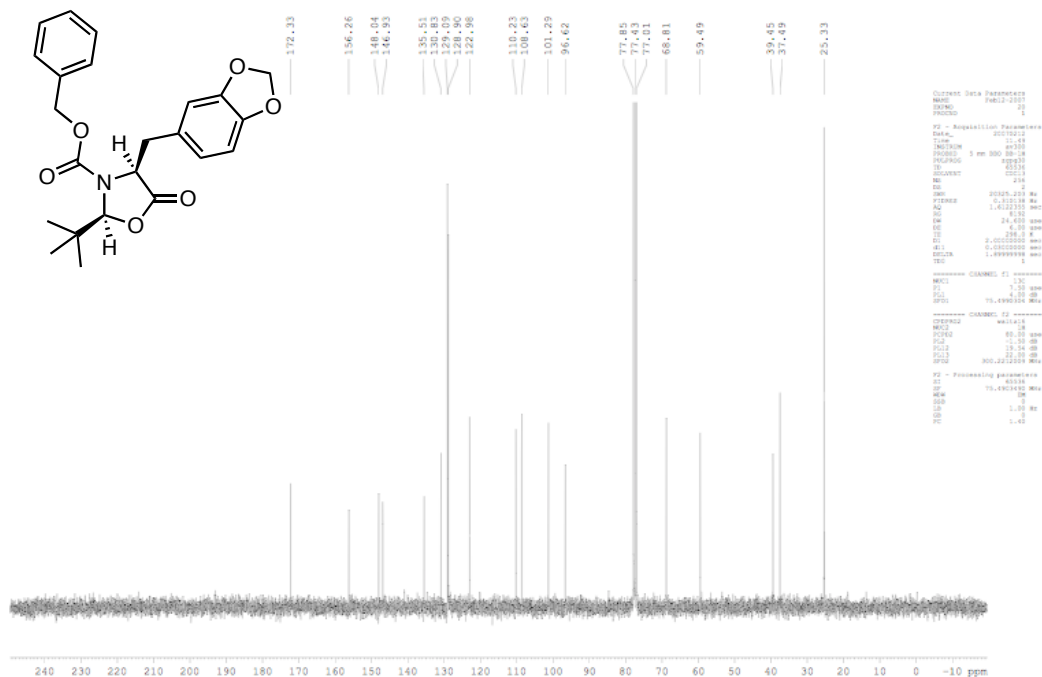

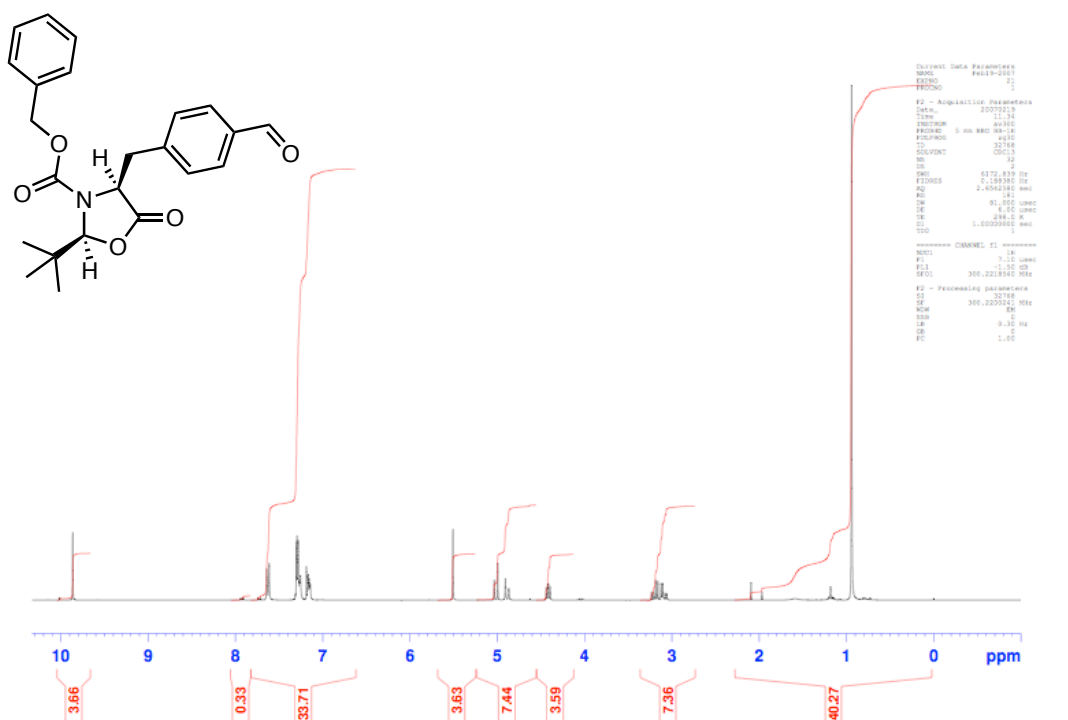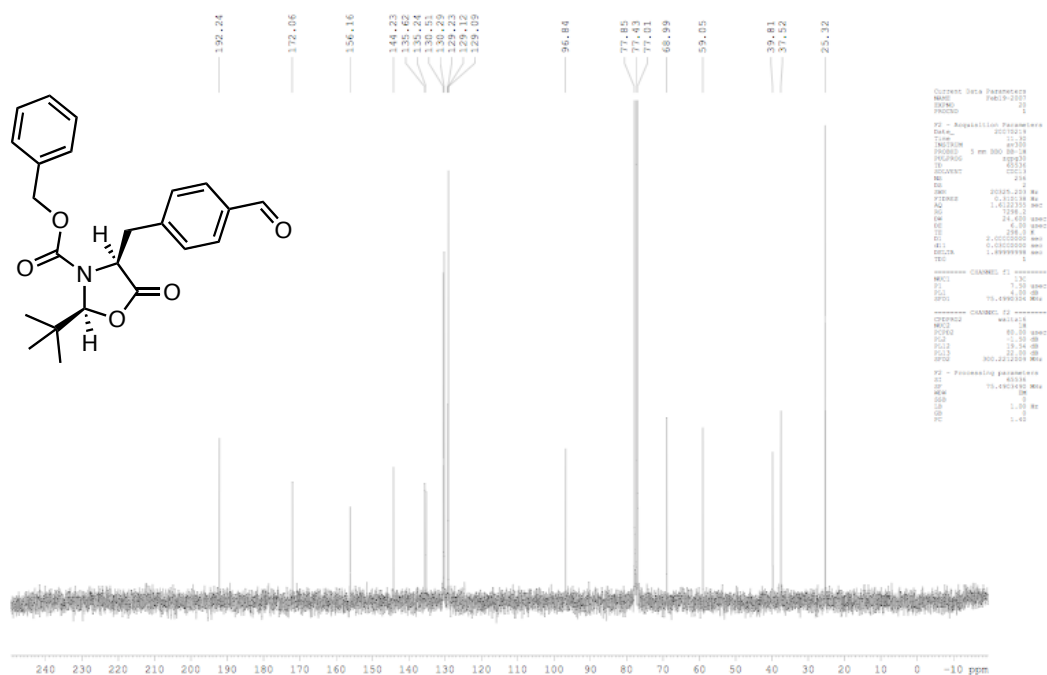

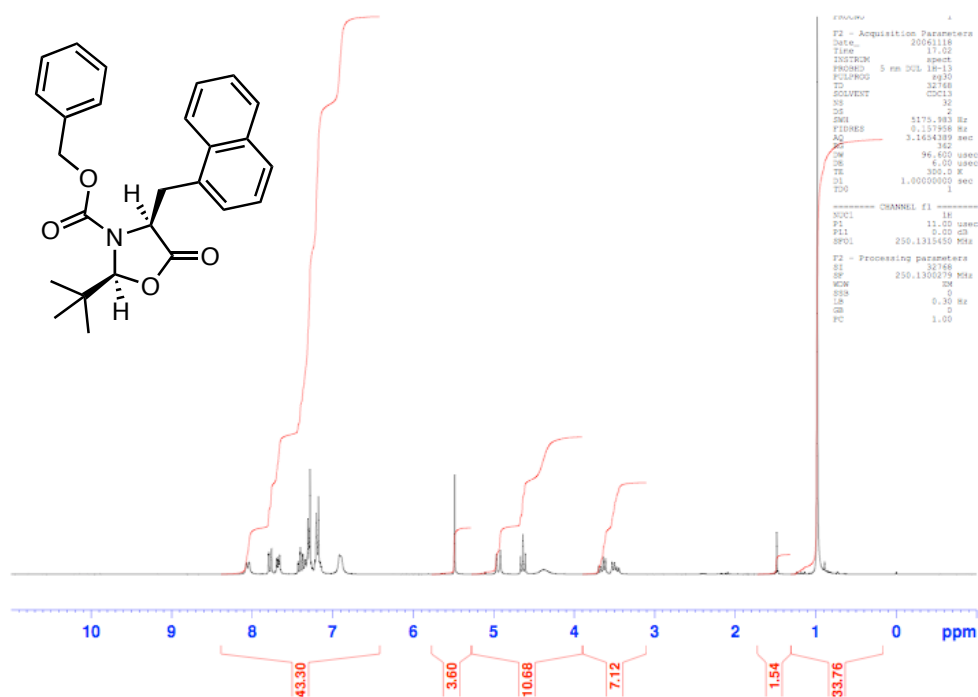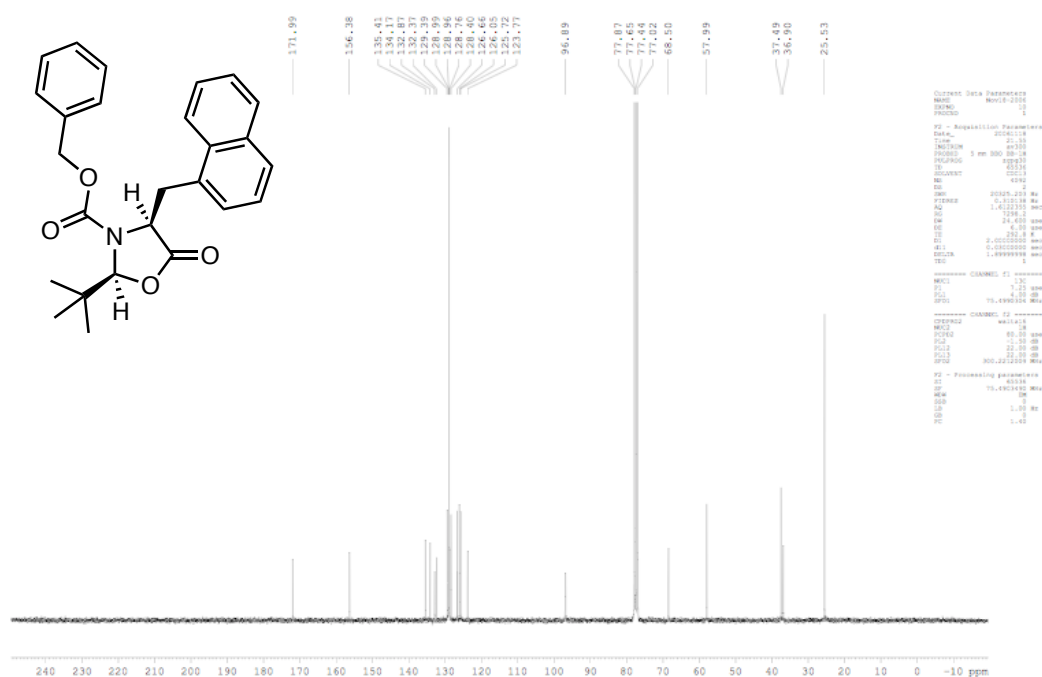

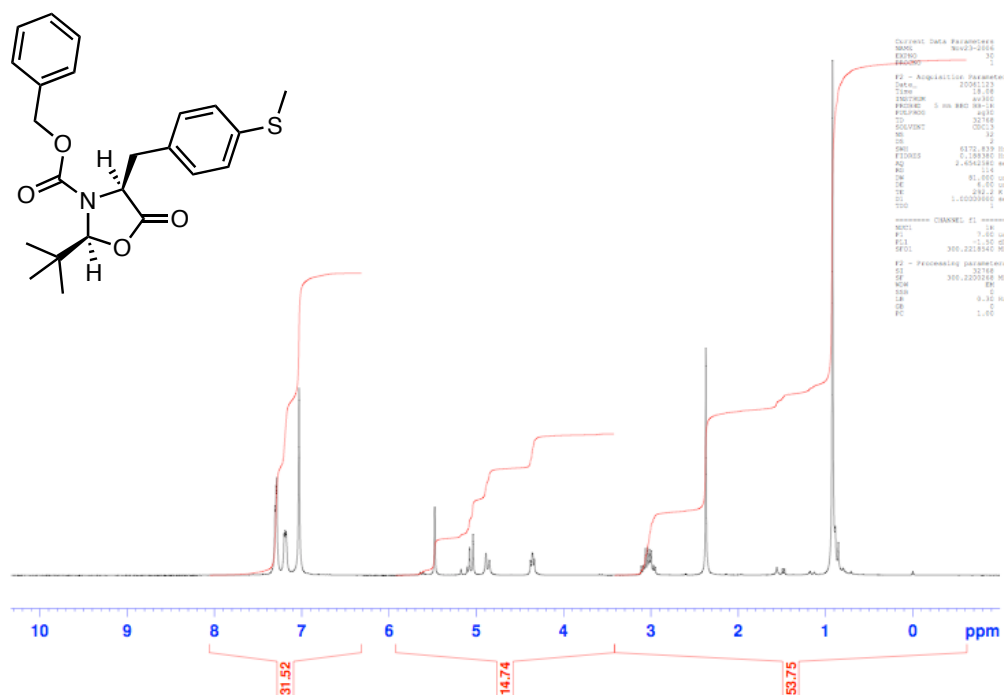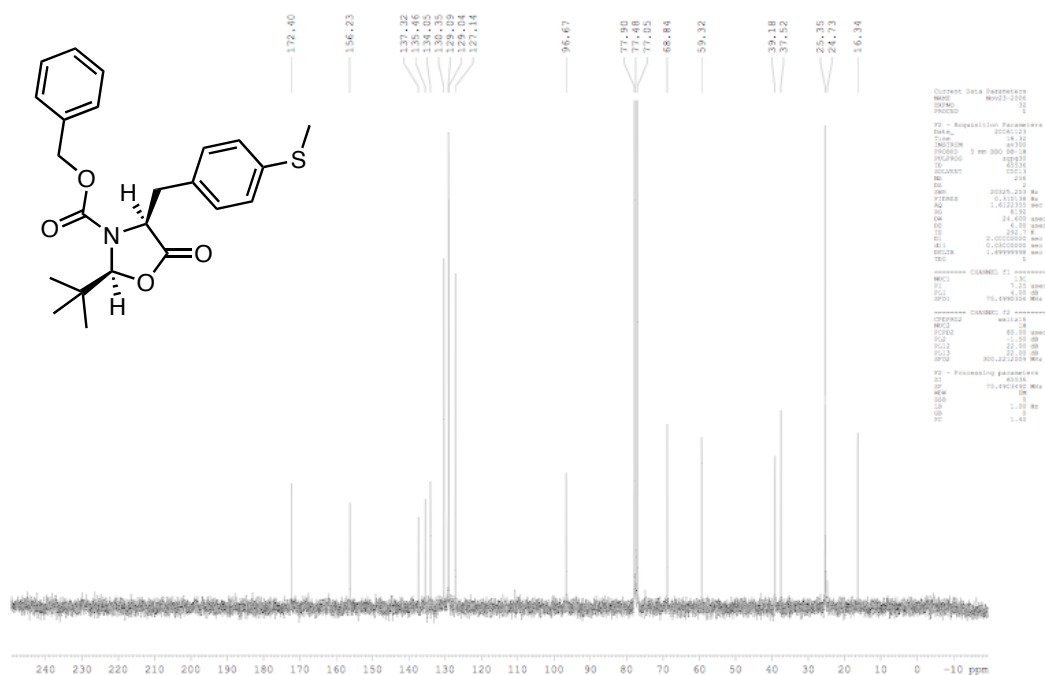

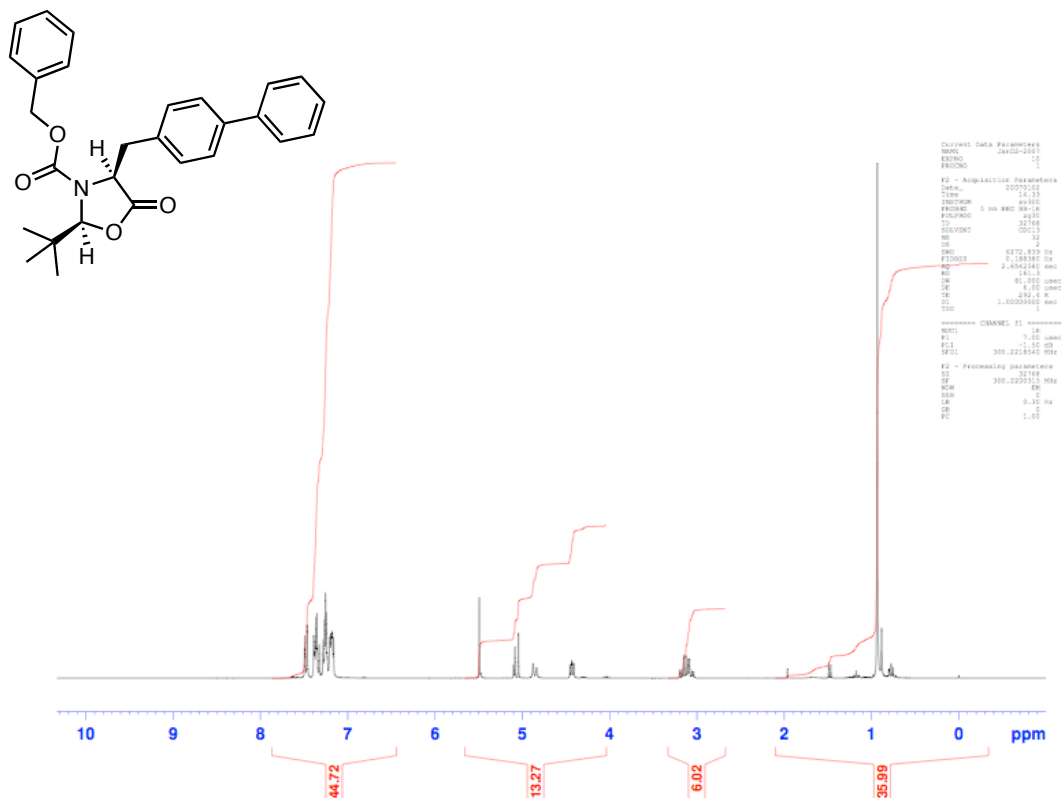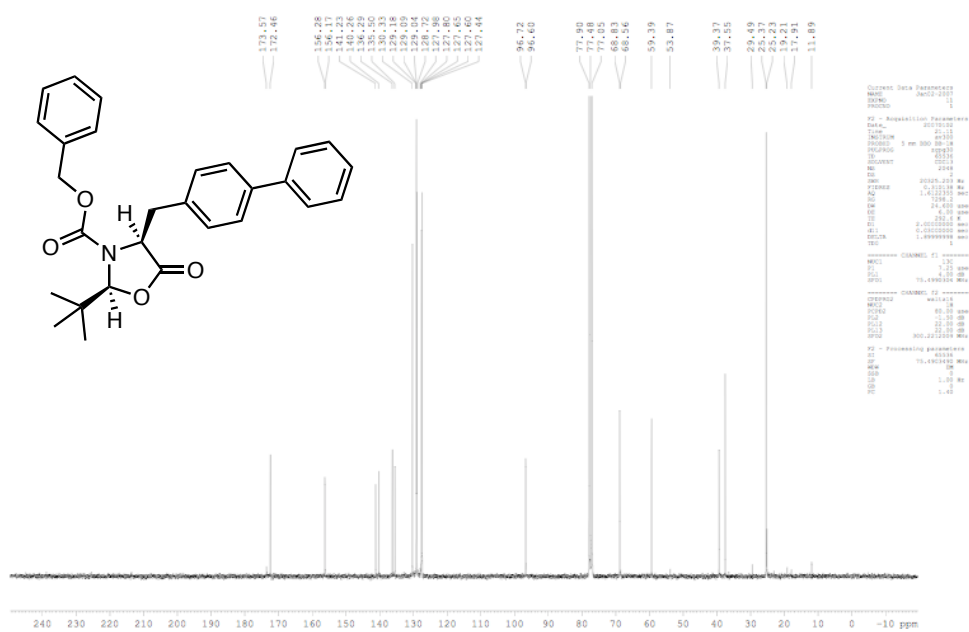

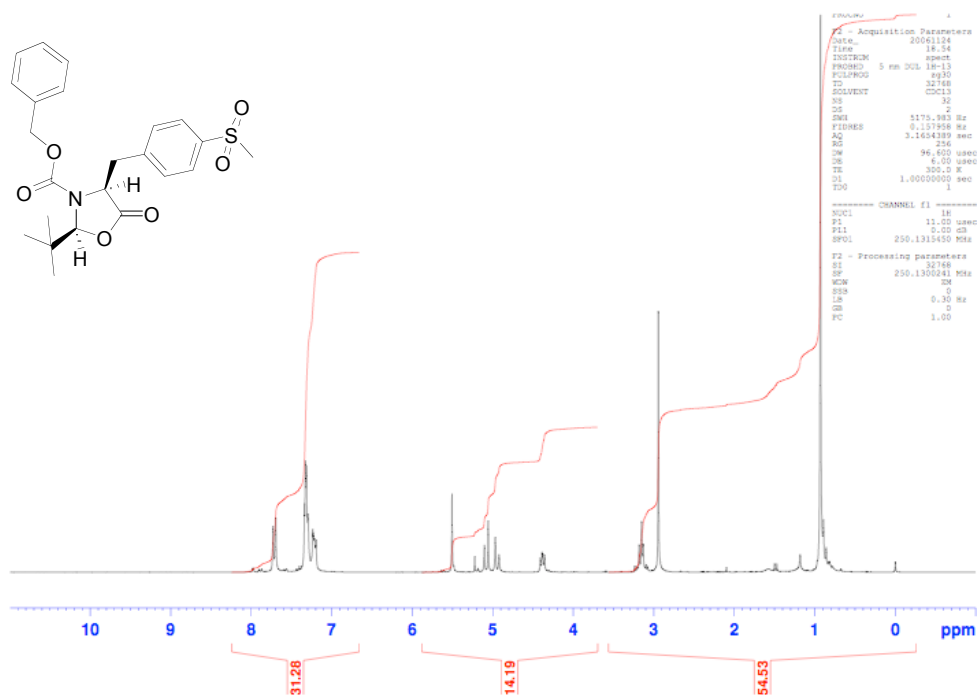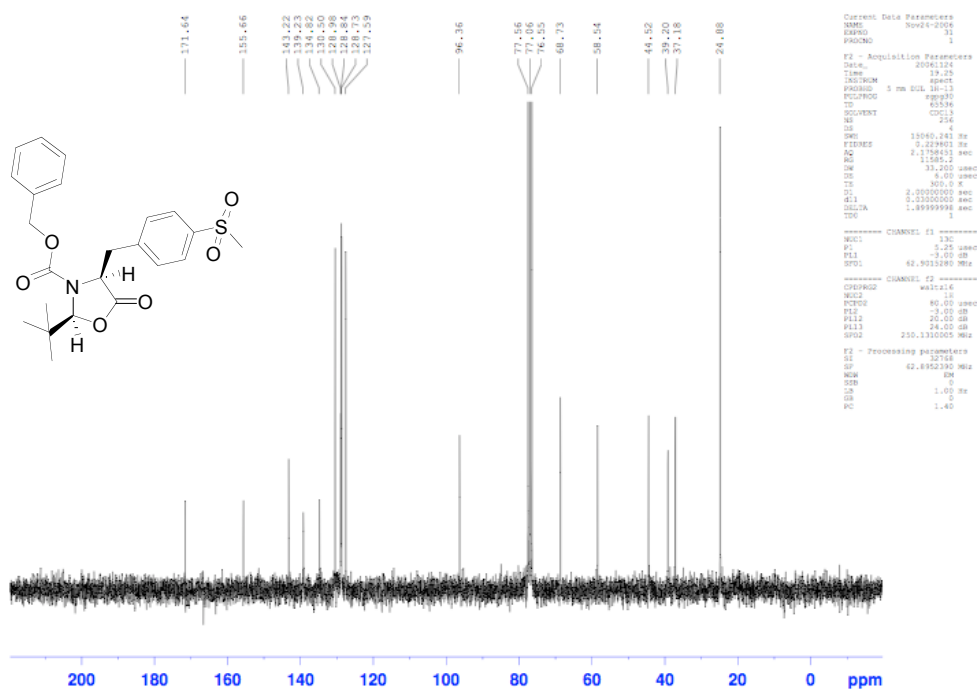

Supplement: c0ob00158a.pdf [file c0ob00158a.pdf]
